# Supplementary material for: Prediction of Quantitative Traits Using Common Genetic Variants: Application to Body Mass Index
Source: PubMed Central journal article supplement — Genomics Inform. 2016 Dec 30;14(4):149–59. doi: 10.5808/GI.2016.14.4.149 (PMC5287118; doi:10.5808/gi.2016.14.4.149), 2016-12-30
Supplement: gni-14-149-s001.pdf [file gni-14-149-s001.pdf]

**Supplementary Table 1.** Genetic information associated with BMI after adjusting for sex, age, and area ( $p < 5.00 \times 10^{-05}$ )

| Top | SNP        | Chr | Position (bp) | Gene            | Risk allele | p-value                |
|-----|------------|-----|---------------|-----------------|-------------|------------------------|
| 1   | rs17178527 | 6   | 141947773     | <i>AK097143</i> | A           | $1.76 \times 10^{-08}$ |
| 2   | rs9939609  | 16  | 52378028      | <i>FTO</i>      | A           | $1.43 \times 10^{-06}$ |
| 3   | rs11000212 | 10  | 73625658      | <i>ASCC1</i>    | C           | $1.45 \times 10^{-06}$ |
| 4   | rs9926289  | 16  | 52378004      | <i>FTO</i>      | C           | $2.45 \times 10^{-06}$ |
| 5   | rs8050136  | 16  | 52373776      | <i>FTO</i>      | A           | $2.91 \times 10^{-06}$ |
| 6   | rs7193144  | 16  | 52368187      | <i>FTO</i>      | A           | $3.42 \times 10^{-06}$ |
| 7   | rs527248   | 1   | 176142137     | -               | A           | $7.01 \times 10^{-06}$ |
| 8   | rs17130257 | 1   | 88342965      | -               | C           | $1.91 \times 10^{-05}$ |
| 9   | rs17089410 | 13  | 71963496      | -               | C           | $2.38 \times 10^{-05}$ |
| 10  | rs16953563 | 15  | 64473824      | <i>MAP2K1</i>   | A           | $3.09 \times 10^{-05}$ |
| 11  | rs17089409 | 13  | 71963167      | -               | A           | $3.09 \times 10^{-05}$ |
| 12  | rs11893160 | 2   | 105411552     | <i>FHL2</i>     | A           | $3.19 \times 10^{-05}$ |
| 13  | rs6893893  | 5   | 160151601     | <i>ATP10B</i>   | A           | $3.39 \times 10^{-05}$ |
| 14  | rs792965   | 5   | 172207869     | <i>ERGIC1</i>   | C           | $3.60 \times 10^{-05}$ |
| 15  | rs1281296  | 1   | 180173334     | <i>ZNF648</i>   | C           | $4.47 \times 10^{-05}$ |
| 16  | rs11193517 | 10  | 109243058     | -               | G           | $4.82 \times 10^{-05}$ |
| 17  | rs12142366 | 1   | 79152758      | <i>ELTD1</i>    | G           | $4.85 \times 10^{-05}$ |
| 18  | rs17851970 | 15  | 64400019      | -               | C           | $4.87 \times 10^{-05}$ |
| 19  | rs1399903  | 3   | 162876798     | -               | A           | $4.95 \times 10^{-05}$ |

BMI, body mass index; SNP, single nucleotide polymorphism; Chr, chromosome.
