# Supplementary material for: Prediction of Quantitative Traits Using Common Genetic Variants: Application to Body Mass Index
Source: PubMed Central journal article supplement — Genomics Inform. 2016 Dec 30;14(4):149–59. doi: 10.5808/GI.2016.14.4.149 (PMC5287118; doi:10.5808/gi.2016.14.4.149), 2016-12-30
Supplement: gni-14-149-s002.pdf [file gni-14-149-s002.pdf]

**Supplementary Table 2.** List of SNPs reported by the GWAS catalog

| SNP        | Chr | Position (bp) | GENE                    | Risk allele | Area  | Sub-group                     |
|------------|-----|---------------|-------------------------|-------------|-------|-------------------------------|
| rs9939609  | 16  | 53786615      | <i>FTO</i>              | A           | Korea | Korean                        |
| rs347313   | 1   | 162334486     | <i>NOS1AP</i>           | G           | Asia  | East Asian                    |
| rs6545814  | 2   | 24908447      | <i>ADCY3, DNAJC27</i>   | G           | Asia  | East Asian                    |
| rs3096490  | 4   | 109057975     | <i>COL25A1</i>          | G           | Asia  | East Asian                    |
| rs259067   | 5   | 79803175      | <i>CMYA5</i>            | A           | Asia  | East Asian                    |
| rs6893807  | 5   | 88669203      | <i>LINC00461</i>        | G           | Asia  | East Asian                    |
| rs1161397  | 6   | 50628740      | <i>DEFB112, TFAP2D</i>  | A           | Asia  | East Asian                    |
| rs6560749  | 10  | 1634336       | <i>ADARB2</i>           | T           | Asia  | South Asian                   |
| rs10904363 | 10  | 4878221       | <i>AKR1CL2</i>          | -           | Asia  | East Asian                    |
| rs11191580 | 10  | 103146454     | <i>NT5C2</i>            | C           | Asia  | East Asian                    |
| rs11030104 | 11  | 27662970      | <i>BDNF</i>             | A           | Asia  | East Asian                    |
| rs652722   | 11  | 31883988      | <i>PAX6</i>             | C           | Asia  | East Asian                    |
| rs2373011  | 12  | 99567571      | <i>ANKS1B</i>           | C           | Asia  | South Asian                   |
| rs12229654 | 12  | 110976657     | <i>MYL2</i>             | T           | Asia  | East Asian                    |
| rs4432245  | 15  | 40032280      | <i>EIF2AK4</i>          | C           | Asia  | East Asian                    |
| rs12597579 | 16  | 20246545      | <i>GP2</i>              | C           | Asia  | East Asian                    |
| rs2336030  | 1   | 11676543      | <i>MAD2L2</i>           | C           | Other | European                      |
| rs10158481 | 1   | 25171301      | <i>SYF2</i>             | T           | Other | European                      |
| rs4568876  | 1   | 31686917      | <i>COL16A1</i>          | T           | Other | European                      |
| rs17102247 | 1   | 46523800      | <i>DMBX1, MKNK1_ASI</i> | C           | Other | European                      |
| rs1514175  | 1   | 74525960      | <i>TNNI3K</i>           | A           | Other | European                      |
| rs6695572  | 1   | 77479950      | <i>AK5</i>              | A           | Other | European                      |
| rs10493773 | 1   | 85660070      | <i>ZNHIT6, COL24A1</i>  | G           | Other | European                      |
| rs10747472 | 1   | 95810642      | <i>FLJ31662</i>         | C           | Other | European                      |
| rs1555543  | 1   | 96479241      | <i>PTBP2</i>            | C           | Other | European                      |
| rs199950   | 1   | 181621722     | <i>CACNA1E</i>          | G           | Other | European                      |
| rs2785980  | 1   | 219527177     | <i>LYPLAL1</i>          | -           | Other | European                      |
| rs939583   | 2   | 622531        | <i>TMEM18</i>           | C           | Other | European                      |
| rs2903492  | 2   | 624678        | <i>TMEM18</i>           | A           | Other | European                      |
| rs6548238  | 2   | 634905        | <i>TMEM18</i>           | C           | Other | European                      |
| rs10495537 | 2   | 6554387       | <i>LOC129607</i>        | T           | Other | European                      |
| rs16984718 | 2   | 18327988      | <i>KCNK3, RDH14</i>     | G           | Other | European                      |
| rs11126666 | 2   | 26705943      | <i>KCNK3</i>            | A           | Other | European                      |
| rs780094   | 2   | 27518370      | <i>GCKR</i>             | -           | Other | European                      |
| rs3736594  | 2   | 27772914      | <i>MRPL33</i>           | -           | Other | European                      |
| rs1979755  | 2   | 42481265      | <i>KCNG3</i>            | C           | Other | European                      |
| rs4566392  | 2   | 79279517      | <i>REG3A</i>            | A           | Other | European                      |
| rs12623360 | 2   | 116071825     | <i>DPP10, DDX18</i>     | C           | Other | European                      |
| rs7599312  | 2   | 212548507     | <i>ERBB4</i>            | G           | Other | European                      |
| rs2943634  | 2   | 226203364     | <i>IRS1</i>             | -           | Other | European                      |
| rs17216035 | 3   | 6439938       | <i>GRM7</i>             | A           | Other | European                      |
| rs11709077 | 3   | 12295008      | <i>PPARG</i>            | A           | Other | European                      |
| rs1801282  | 3   | 12351626      | <i>PPARG</i>            | -           | Other | European                      |
| rs6810295  | 3   | 31926475      | -                       | -           | Other | African-American and Hispanic |
| rs1024889  | 3   | 70414179      | -                       | G           | Other | European                      |
| rs4402960  | 3   | 185793899     | <i>IG2BP2</i>           | T           | Other | -                             |
| rs1470579  | 3   | 185811292     | <i>IGF2BP2</i>          | -           | Other | European                      |
| rs348495   | 4   | 45182425      | <i>GNPDA2</i>           | G           | Other | Hispanic                      |
| rs17001654 | 4   | 76208415      | <i>SCARB2</i>           | G           | Other | European                      |
| rs2391518  | 4   | 129895905     | <i>C4orf33</i>          | T           | Other | European                      |
| rs4691380  | 4   | 156798972     | <i>PDGFC</i>            | -           | Other | European                      |

|            |    |           |                              |   |       |                               |
|------------|----|-----------|------------------------------|---|-------|-------------------------------|
| rs17668565 | 5  | 92818872  | intergenic                   | G | Other | Hispanic                      |
| rs7713317  | 5  | 96381018  | <i>PCSK1</i>                 | G | Other | European                      |
| rs6864049  | 5  | 124994829 | <i>ZNF608</i>                | G | Other | European                      |
| rs17524553 | 5  | 147081128 | <i>PPP2R2B</i>               | T | Other | European                      |
| rs244731   | 5  | 177112678 | <i>NSD1, PREL1D1, RAB34</i>  | G | Other | European                      |
| rs12517906 | 5  | 180743819 | -                            | G | Other | European                      |
| rs4246076  | 6  | 6592816   | <i>LY86</i>                  | G | Other | European                      |
| rs16890640 | 6  | 25469103  | <i>LRRC16</i>                | T | Other | European                      |
| rs1165196  | 6  | 25812922  | <i>SLC17A1, SLC17A4</i>      | G | Other | European                      |
| rs3916765  | 6  | 32717773  | <i>HLA-DQA2</i>              | A | Other | -                             |
| rs943466   | 6  | 33764010  | <i>LEMD2</i>                 | G | Other | European                      |
| rs4646949  | 6  | 34877672  | <i>UHRF1BP1</i>              | - | Other | European                      |
| rs9357506  | 6  | 46367432  | <i>RCAN2</i>                 | G | Other | European                      |
| rs6934970  | 6  | 112803099 | <i>LOC100287612, MARCKS</i>  | - | Other | European                      |
| rs2275215  | 6  | 129540247 | <i>LAMA2</i>                 | T | Other | European                      |
| rs6569648  | 6  | 130027974 | <i>L3MBTL3</i>               | C | Other | European                      |
| rs9495528  | 6  | 139577721 | <i>CITED2, LOC100132735</i>  | C | Other | European                      |
| rs12538804 | 7  | 7654288   | <i>RPA3</i>                  | G | Other | European                      |
| rs2529049  | 7  | 24679987  | <i>MPP6, DFNA5</i>           | G | Other | European                      |
| rs10499694 | 7  | 50546475  | <i>DDC</i>                   | A | Other | European                      |
| rs1106683  | 7  | 131768766 | intergenic                   | - | Other | European                      |
| rs1106684  | 7  | 131768906 | intergenic                   | - | Other | European                      |
| rs929354   | 7  | 157252863 | <i>UBE3C</i>                 | T | Other | European                      |
| rs11997175 | 8  | 33912552  | <i>DUSP26</i>                | C | Other | European                      |
| rs13273088 | 8  | 69581739  | <i>SULF1</i>                 | - | Other | European                      |
| rs3115775  | 8  | 117695487 | <i>MED30, EXT1</i>           | C | Other | European                      |
| rs7830341  | 8  | 127097685 | <i>PCAT1</i>                 | G | Other | European                      |
| rs10811661 | 9  | 22134095  | <i>CDKN2B</i>                | - | Other | European                      |
| rs7864204  | 9  | 68614263  | <i>LOC347097, PIP5K1B</i>    | A | Other | African-American              |
| rs6477694  | 9  | 109170062 | <i>EPB41L4B</i>              | C | Other | European                      |
| rs17806457 | 9  | 110129355 | -                            | - | Other | African-American and Hispanic |
| rs1928295  | 9  | 117616205 | <i>TLR4</i>                  | T | Other | European                      |
| rs11259403 | 10 | 6530263   | <i>PRKCCQ</i>                | C | Other | European                      |
| rs7920888  | 10 | 89058620  | <i>FAS</i>                   | A | Other | Hispanic                      |
| rs5015480  | 10 | 92705802  | <i>HHEX</i>                  | C | Other | -                             |
| rs17094222 | 10 | 100635683 | <i>HIF1AN</i>                | C | Other | European                      |
| rs11191560 | 10 | 103109281 | <i>NT5C2</i>                 | C | Other | European                      |
| rs12772424 | 10 | 113120792 | <i>TCF7L2</i>                | - | Other | European                      |
| rs941853   | 10 | 114439416 | <i>ABLIM1</i>                | A | Other | Hispanic                      |
| rs751008   | 10 | 127344153 | <i>DOCK1</i>                 | A | Other | European                      |
| rs11041816 | 11 | 8222251   | <i>LMO1</i>                  | - | Other | European                      |
| rs10769908 | 11 | 8462542   | <i>STK33</i>                 | C | Other | European                      |
| rs9633835  | 11 | 13324046  | <i>ARNTL</i>                 | G | Other | European                      |
| rs297325   | 11 | 16368048  | <i>SOX6</i>                  | C | Other | European                      |
| rs7481311  | 11 | 27561582  | <i>BDNF</i>                  | T | Other | European                      |
| rs6265     | 11 | 27658369  | <i>BDNF</i>                  | G | Other | European                      |
| rs10742752 | 11 | 45416824  | <i>SYT13</i>                 | C | Other | European                      |
| rs3817334  | 11 | 47629441  | <i>MTCH2, NDUFS3, CUGBP1</i> | T | Other | European                      |
| rs1459104  | 11 | 55545057  | <i>OR4C15</i>                | A | Other | European                      |
| rs10897518 | 11 | 64593233  | <i>SLC22A12, NRXN2</i>       | C | Other | European                      |
| rs321358   | 11 | 111125247 | <i>C11orf53</i>              | G | Other | European                      |
| rs12286929 | 11 | 115151684 | <i>CADM1</i>                 | G | Other | European                      |
| rs11611246 | 12 | 830314    | <i>WNK1</i>                  | T | Other | European                      |
| rs12300553 | 12 | 15228276  | <i>RERG</i>                  | G | Other | European                      |

|            |    |           |                              |   |       |                  |
|------------|----|-----------|------------------------------|---|-------|------------------|
| rs7138803  | 12 | 49853685  | <i>BCDIN3D, FAIM2</i>        | A | Other | European         |
| rs2198776  | 12 | 61841052  | <i>FAM19A2</i>               | A | Other | Hispanic         |
| rs1502337  | 12 | 110625047 | <i>TCTN1</i>                 | T | Other | European         |
| rs4304868  | 12 | 117732104 | <i>KSR2</i>                  | A | Other | European         |
| rs1043607  | 12 | 125658800 | <i>TMEM132B</i>              | - | Other | European         |
| rs9552416  | 13 | 18737101  | <i>TUBA3C</i>                | - | Other | European         |
| rs7324557  | 13 | 23722723  | <i>TNFRSF19, MIPEP</i>       | G | Other | European         |
| rs9507983  | 13 | 28045899  | <i>FLT3</i>                  | C | Other | European         |
| rs2555603  | 13 | 33224125  | <i>STARD13, RP11-81F11.3</i> | C | Other | European         |
| rs9563576  | 13 | 58096013  | <i>PCDH17</i>                | C | Other | European         |
| rs1335587  | 13 | 101493209 | <i>ITGBL1</i>                | G | Other | Hispanic         |
| rs10136789 | 14 | 62889535  | <i>KCNH5</i>                 | - | Other | European         |
| rs7141420  | 14 | 79433111  | <i>NRXN3</i>                 | T | Other | European         |
| rs12324805 | 15 | 82059859  | <i>RKHD3</i>                 | C | Other | European         |
| rs17541406 | 15 | 93346230  | <i>MCTP2, SEPHS1P2</i>       | - | Other | European         |
| rs9940128  | 16 | 53766842  | <i>FTO</i>                   | A | Other | European         |
| rs1121980  | 16 | 53775335  | <i>FTO</i>                   | - | Other | European         |
| rs8050136  | 16 | 53782363  | <i>FTO</i>                   | A | Other | European         |
| rs9930506  | 16 | 53796553  | <i>FTO</i>                   | A | Other | European         |
| rs4144743  | 17 | 47245759  | <i>ITGB3</i>                 | C | Other | European         |
| rs4969049  | 17 | 73004801  | <i>SLC39A11</i>              | C | Other | African-American |
| rs10502431 | 18 | 22436012  | <i>CTAGE1</i>                | C | Other | European         |
| rs11876941 | 18 | 53379661  | <i>DCC</i>                   | A | Other | African-American |
| rs7234864  | 18 | 60067625  | <i>MC4R, PMAIP1</i>          | T | Other | European         |
| rs17782313 | 18 | 60183864  | <i>MC4R</i>                  | C | Other | European         |
| rs33439    | 19 | 30454264  | <i>ZNF536</i>                | T | Other | European         |
| rs1413020  | 20 | 12749395  | <i>PA2G4P2, SPTLC3</i>       | G | Other | African-American |
| rs2144134  | 20 | 13167505  | <i>LOC100130692, SPTLC3</i>  | G | Other | African-American |
| rs2836754  | 21 | 38919816  | <i>ETS2</i>                  | C | Other | European         |
| rs914187   | 21 | 41247822  | <i>BACE2</i>                 | C | Other | European         |
| rs134871   | 22 | 42256710  | <i>LOC388906</i>             | C | Other | European         |

SNP, single-nucleotide polymorphism; GWAS, genome-wide association study; Chr, chromosome.
