# Supplementary material for: Prediction of Quantitative Traits Using Common Genetic Variants: Application to Body Mass Index
Source: PubMed Central journal article supplement — Genomics Inform. 2016 Dec 30;14(4):149–59. doi: 10.5808/GI.2016.14.4.149 (PMC5287118; doi:10.5808/gi.2016.14.4.149), 2016-12-30

**Supplementary Fig. 1.** Results of single-SNP analysis for 344,893 SNPs in KARE data. (A) QQ plot of p-values derived from linear regression with adjustments for sex, age, and area. The 95% confidence interval around the null hypothesis is displayed as the shaded portion. (B) Manhattan plot of the single-SNP analysis. The red dotted line marks the threshold for genome-wide significance ( $p = 1.45 \times 10^{-07}$ ). SNP, single-nucleotide polymorphism; KARE, Korea Association Resource; QQ, quantile-quantile.

(A)

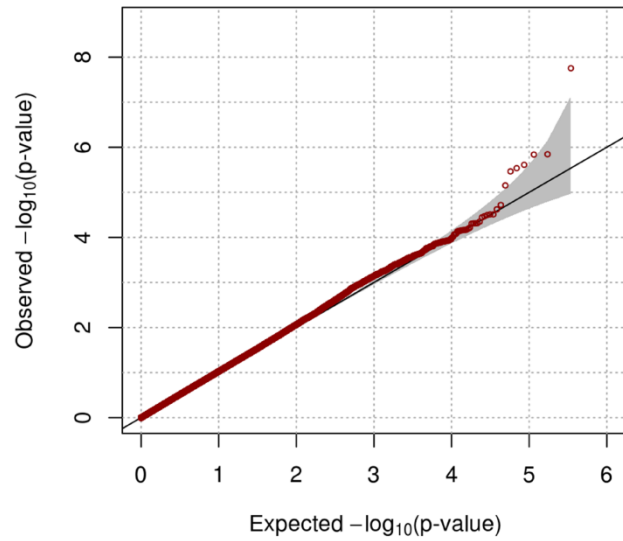

(B)

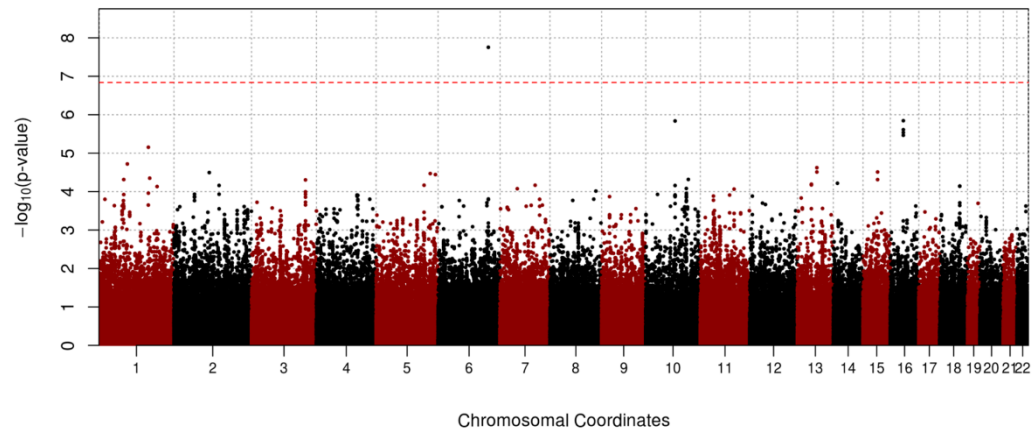

Supplement: gni-14-149-s003.pdf [file gni-14-149-s003.pdf]
